# Supplementary material
Source: publisher figshare collection journal article supplement (https://frontiersin.figshare.com/ndownloader/files/24022217)
Supplement: Supplementary file [file 24022217]

A)

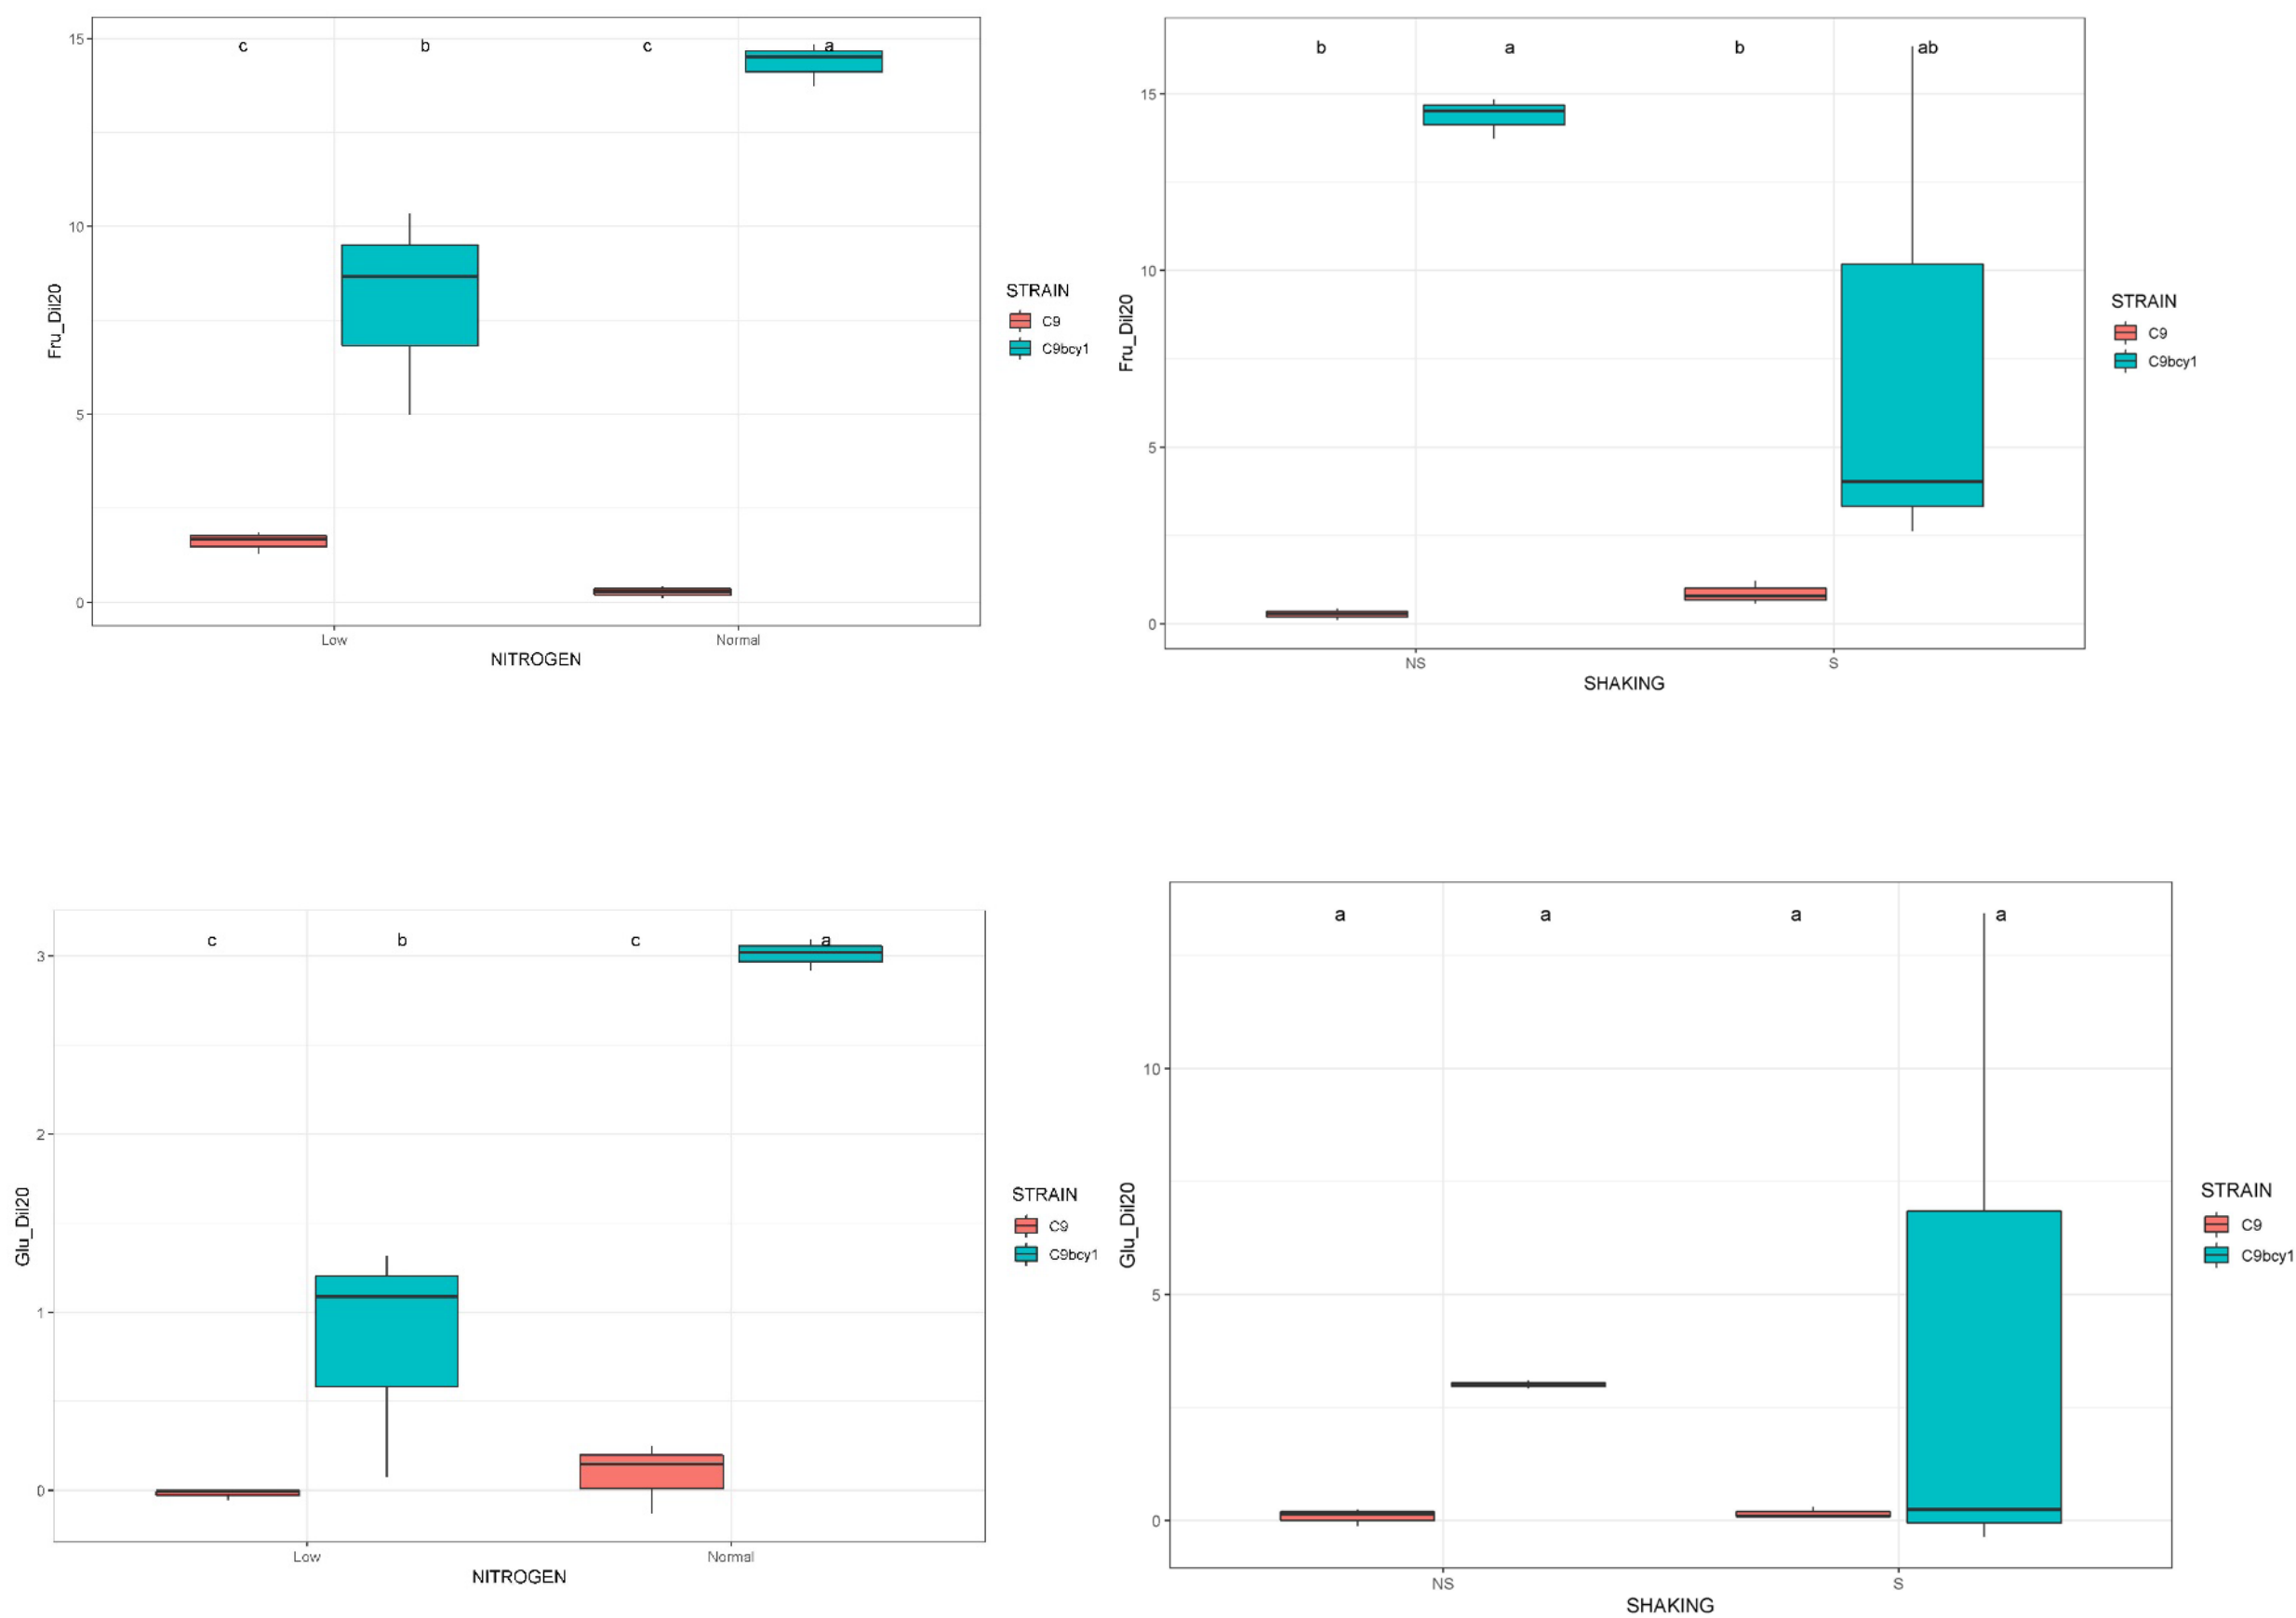

B)

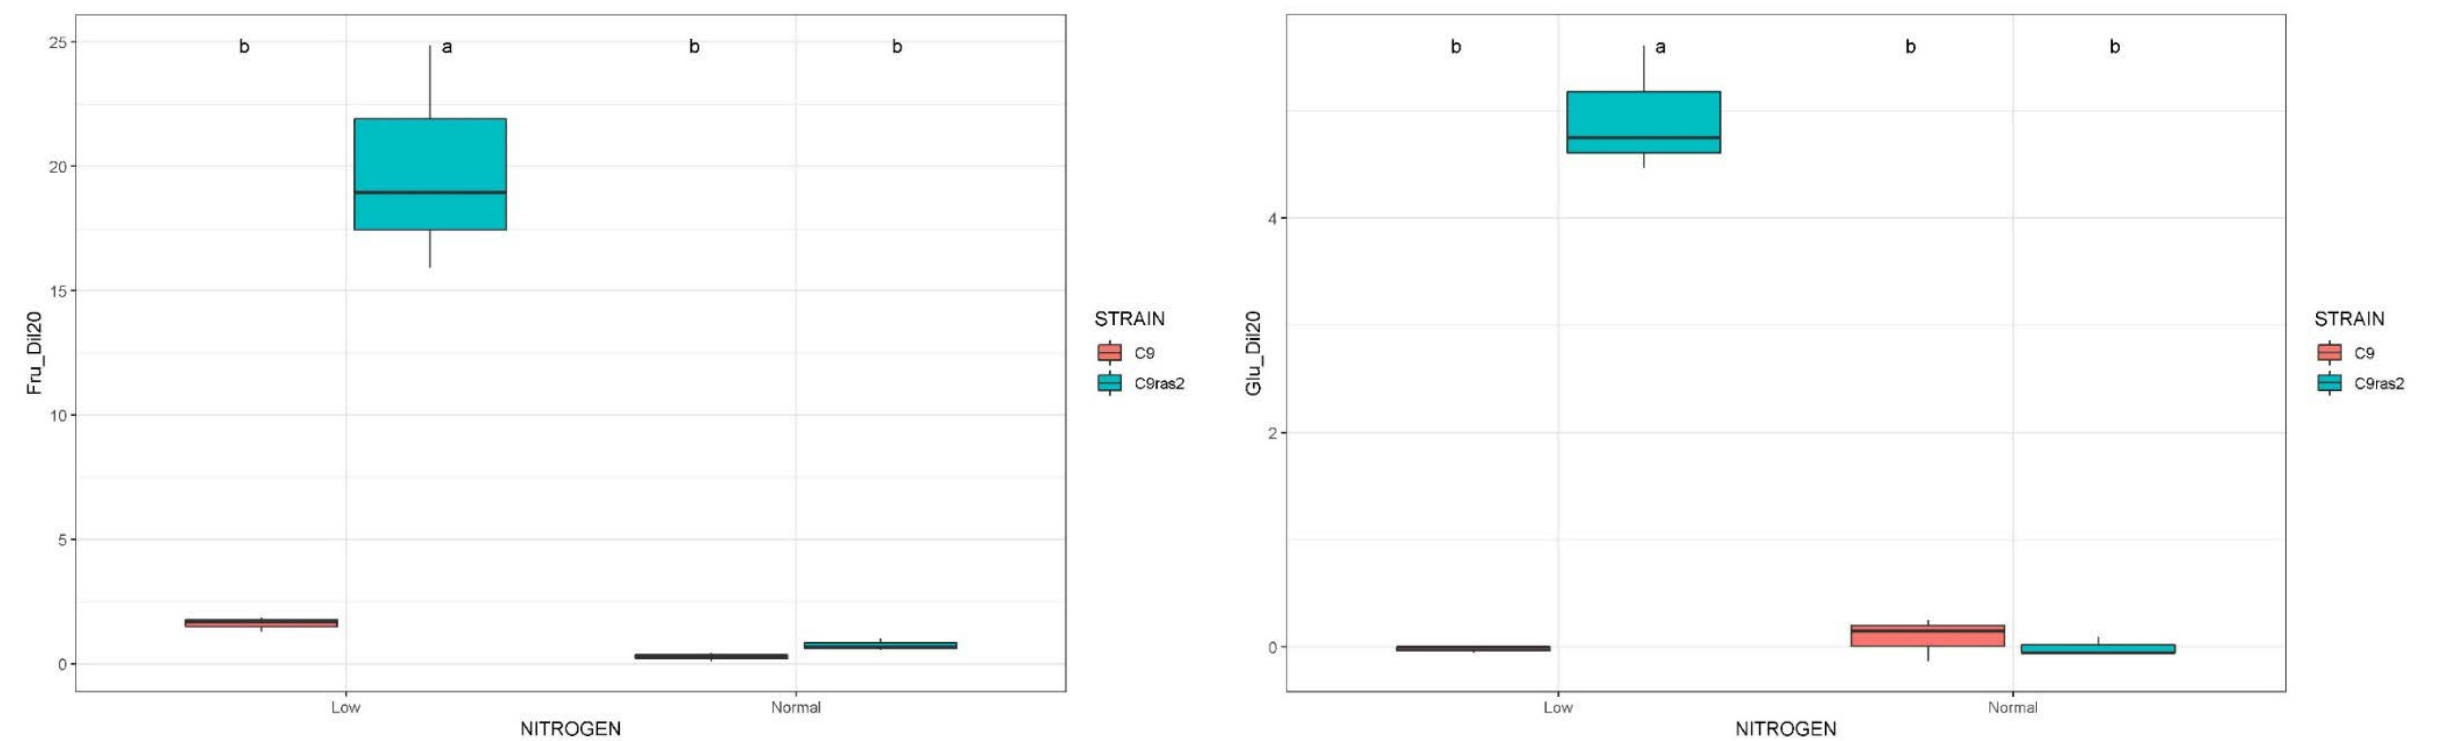

Supplemental Figure S1. A) Residual sugars of *bcy1* $\Delta$  mutant after fermentation. B) Residual sugars of *ras2* $\Delta$  mutant at low nitrogen
